# Supplementary material for: Consequences of screening in colorectal cancer (COS-CRC): development and dimensionality of a questionnaire
Source: PubMed Central journal article supplement (PMC7792180; doi:10.1186/s40359-020-00504-3), 2021-01-07
Supplement: 40359_2020_504_MOESM1_ESM.pdf [file 40359_2020_504_MOESM1_ESM.pdf]

# **Questionnaire**

**to people, who have participated in screening  
for colorectal cancer**

With this questionnaire, we aim to collect information about how it affects people to participate in screening for colorectal cancer.

It is important that you respond to all the questions.

## Part I

Have you, **during the last four days**, experienced any of the following?

|                                         | Not at all               | A bit                    | Quite a bit              | A lot                    |
|-----------------------------------------|--------------------------|--------------------------|--------------------------|--------------------------|
| 1. I have been worried.                 | <input type="checkbox"/> | <input type="checkbox"/> | <input type="checkbox"/> | <input type="checkbox"/> |
| 2. I have been worried about my future. | <input type="checkbox"/> | <input type="checkbox"/> | <input type="checkbox"/> | <input type="checkbox"/> |
| 3. I have been scared.                  | <input type="checkbox"/> | <input type="checkbox"/> | <input type="checkbox"/> | <input type="checkbox"/> |
| 4. I have been irritable.               | <input type="checkbox"/> | <input type="checkbox"/> | <input type="checkbox"/> | <input type="checkbox"/> |
| 5. I have been quieter than normal.     | <input type="checkbox"/> | <input type="checkbox"/> | <input type="checkbox"/> | <input type="checkbox"/> |
| 6. I have slept badly.                  | <input type="checkbox"/> | <input type="checkbox"/> | <input type="checkbox"/> | <input type="checkbox"/> |

Have you, **during the last four days**, experienced any of the following?

|                                           | Not at all               | A bit                    | Quite a bit              | A lot                    |
|-------------------------------------------|--------------------------|--------------------------|--------------------------|--------------------------|
| 7. I have had difficulties concentrating. | <input type="checkbox"/> | <input type="checkbox"/> | <input type="checkbox"/> | <input type="checkbox"/> |
| 8. I have felt that time passed slowly.   | <input type="checkbox"/> | <input type="checkbox"/> | <input type="checkbox"/> | <input type="checkbox"/> |
| 9. My appetite has changed.               | <input type="checkbox"/> | <input type="checkbox"/> | <input type="checkbox"/> | <input type="checkbox"/> |
| 10. I have been sad.                      | <input type="checkbox"/> | <input type="checkbox"/> | <input type="checkbox"/> | <input type="checkbox"/> |
| 11. I have been upset.                    | <input type="checkbox"/> | <input type="checkbox"/> | <input type="checkbox"/> | <input type="checkbox"/> |
| 12. I have been restless.                 | <input type="checkbox"/> | <input type="checkbox"/> | <input type="checkbox"/> | <input type="checkbox"/> |

Have you, **during the last four days**, experienced any of the following?

|                                              | Not at all               | A bit                    | Quite a bit              | A lot                    |
|----------------------------------------------|--------------------------|--------------------------|--------------------------|--------------------------|
| 13. I have been nervous.                     | <input type="checkbox"/> | <input type="checkbox"/> | <input type="checkbox"/> | <input type="checkbox"/> |
| 14. I have been uneasy.                      | <input type="checkbox"/> | <input type="checkbox"/> | <input type="checkbox"/> | <input type="checkbox"/> |
| 15. It has taken a long time to fall asleep. | <input type="checkbox"/> | <input type="checkbox"/> | <input type="checkbox"/> | <input type="checkbox"/> |
| 16. I have withdrawn into myself.            | <input type="checkbox"/> | <input type="checkbox"/> | <input type="checkbox"/> | <input type="checkbox"/> |
| 17. I have been unable to cope.              | <input type="checkbox"/> | <input type="checkbox"/> | <input type="checkbox"/> | <input type="checkbox"/> |
| 18. I have been depressed.                   | <input type="checkbox"/> | <input type="checkbox"/> | <input type="checkbox"/> | <input type="checkbox"/> |

Have you, **during the last four days**, experienced any of the following?      Not at all      A few times      Some-times      Many times

19. I have had difficulties dealing with work or other commitments.                       

20. I have woken up far too early in the morning.                       

21. I have had difficulties doing things around the house.                       

22. I have been terrified.                       

23. I have been awake most of the night.                       

Have you, **during the last four days**, experienced any of the following?      Not at all      A bit      Quite a bit      A lot

24. I have felt sorry for myself.                       

25. I have been shocked.                       

26.\* Fear of colorectal cancer has, more than usual, been in the back of my mind.                       

27. I have felt insecure.                       

28. I have felt as though something was wrong with my body.                       

Have you, **during the last four days**, experienced any of the following?      Not at all      A bit      Quite a bit      A lot

29. I have felt as though my body was a machine that does not work.                       

30. I have thought my situation was hopeless.                       

31. I have experienced that I lost control.                       

32. I have experienced mood swings.

Have you, **during the last four days**, experienced any of the following?

|                                             | Not at all               | A bit                    | Quite a bit              | A lot                    |
|---------------------------------------------|--------------------------|--------------------------|--------------------------|--------------------------|
| 33. I have thought my body was vulnerable.  | <input type="checkbox"/> | <input type="checkbox"/> | <input type="checkbox"/> | <input type="checkbox"/> |
| 34. I have kept my thoughts to myself.      | <input type="checkbox"/> | <input type="checkbox"/> | <input type="checkbox"/> | <input type="checkbox"/> |
| 35. I have felt that I am getting old.      | <input type="checkbox"/> | <input type="checkbox"/> | <input type="checkbox"/> | <input type="checkbox"/> |
| 36. I have felt sour (attitude).            | <input type="checkbox"/> | <input type="checkbox"/> | <input type="checkbox"/> | <input type="checkbox"/> |
| 37. I have been angry.                      | <input type="checkbox"/> | <input type="checkbox"/> | <input type="checkbox"/> | <input type="checkbox"/> |
| 38. I have felt as I have been in a vacuum. | <input type="checkbox"/> | <input type="checkbox"/> | <input type="checkbox"/> | <input type="checkbox"/> |

Have you, **during the last four days**, experienced any of the following?

|                                        | Not at all               | A bit                    | Quite a bit              | A lot                    |
|----------------------------------------|--------------------------|--------------------------|--------------------------|--------------------------|
| 39. I have felt older than my own age. | <input type="checkbox"/> | <input type="checkbox"/> | <input type="checkbox"/> | <input type="checkbox"/> |
| 40. I have felt powerless.             | <input type="checkbox"/> | <input type="checkbox"/> | <input type="checkbox"/> | <input type="checkbox"/> |
| 41.* I have been frightened.           | <input type="checkbox"/> | <input type="checkbox"/> | <input type="checkbox"/> | <input type="checkbox"/> |
| 42. I have felt that I was unlucky.    | <input type="checkbox"/> | <input type="checkbox"/> | <input type="checkbox"/> | <input type="checkbox"/> |
| 43. I have changed diet.               | <input type="checkbox"/> | <input type="checkbox"/> | <input type="checkbox"/> | <input type="checkbox"/> |
| 44.* I have changed exercise habits.   | <input type="checkbox"/> | <input type="checkbox"/> | <input type="checkbox"/> | <input type="checkbox"/> |

Have you, **during the last four days**, experienced any of the following?

|                                     | Not at all               | A bit                    | Quite a bit              | A lot                    | Do not know              |
|-------------------------------------|--------------------------|--------------------------|--------------------------|--------------------------|--------------------------|
| 45.* Less interest in sex.          | <input type="checkbox"/> | <input type="checkbox"/> | <input type="checkbox"/> | <input type="checkbox"/> | <input type="checkbox"/> |
| 46. Negative impact on my sex life. | <input type="checkbox"/> | <input type="checkbox"/> | <input type="checkbox"/> | <input type="checkbox"/> | <input type="checkbox"/> |

## Part IX

### Questions about the bowel preparation

| Have you, <b>during the last four days</b> , experienced any of the following? | Not at all               | A bit                    | Quite a bit              | A lot                    |
|--------------------------------------------------------------------------------|--------------------------|--------------------------|--------------------------|--------------------------|
| 47. I felt discomfort with having the bowel emptied.                           | <input type="checkbox"/> | <input type="checkbox"/> | <input type="checkbox"/> | <input type="checkbox"/> |
| 48. I have had a feeling of having a lesion on the rectum.                     | <input type="checkbox"/> | <input type="checkbox"/> | <input type="checkbox"/> | <input type="checkbox"/> |
| 49. I have had a stinging feeling in the rectum.                               | <input type="checkbox"/> | <input type="checkbox"/> | <input type="checkbox"/> | <input type="checkbox"/> |
| 50. I felt pain during emptying of bowel.                                      | <input type="checkbox"/> | <input type="checkbox"/> | <input type="checkbox"/> | <input type="checkbox"/> |
| 51. I have had a feeling of a rash on the backside.                            | <input type="checkbox"/> | <input type="checkbox"/> | <input type="checkbox"/> | <input type="checkbox"/> |
| 52. I felt stranded at home during emptying of bowel.                          | <input type="checkbox"/> | <input type="checkbox"/> | <input type="checkbox"/> | <input type="checkbox"/> |
| 53.* I was worried about drinking other fluids during emptying of bowel.       | <input type="checkbox"/> | <input type="checkbox"/> | <input type="checkbox"/> | <input type="checkbox"/> |

### Questions about colorectal polyps

| Have you, <b>during the last four days</b> , experienced any of the following? | Not at all               | A bit                    | Quite a bit              | A lot                    |
|--------------------------------------------------------------------------------|--------------------------|--------------------------|--------------------------|--------------------------|
| 54. Anxious about having one or more polyps.                                   | <input type="checkbox"/> | <input type="checkbox"/> | <input type="checkbox"/> | <input type="checkbox"/> |
| 55. I have been confused about what it means to have one or more polyps.       | <input type="checkbox"/> | <input type="checkbox"/> | <input type="checkbox"/> | <input type="checkbox"/> |

## Questions about the colonoscopy

| Have you, <b>during the last four days</b> , experienced any of the following? | Not at all               | A bit                    | Quite a bit              | A lot                    |
|--------------------------------------------------------------------------------|--------------------------|--------------------------|--------------------------|--------------------------|
| 56. I felt discomfort during the colonoscopy.                                  | <input type="checkbox"/> | <input type="checkbox"/> | <input type="checkbox"/> | <input type="checkbox"/> |
| 57. I felt defenseless lying on the examination table.                         | <input type="checkbox"/> | <input type="checkbox"/> | <input type="checkbox"/> | <input type="checkbox"/> |
| 58. I felt vulnerable lying on the examination table.                          | <input type="checkbox"/> | <input type="checkbox"/> | <input type="checkbox"/> | <input type="checkbox"/> |
| 59. I felt pain during the colonoscopy.                                        | <input type="checkbox"/> | <input type="checkbox"/> | <input type="checkbox"/> | <input type="checkbox"/> |
| 60. I felt humiliation lying on the examination table.                         | <input type="checkbox"/> | <input type="checkbox"/> | <input type="checkbox"/> | <input type="checkbox"/> |
| 61. The examination was a harsh experience.                                    | <input type="checkbox"/> | <input type="checkbox"/> | <input type="checkbox"/> | <input type="checkbox"/> |
| 62. The examination overstepped my boundaries.                                 | <input type="checkbox"/> | <input type="checkbox"/> | <input type="checkbox"/> | <input type="checkbox"/> |
| 63. I felt exposed lying on the examination table.                             | <input type="checkbox"/> | <input type="checkbox"/> | <input type="checkbox"/> | <input type="checkbox"/> |
| 64. I have had regrets having participated in the screening programme.         | <input type="checkbox"/> | <input type="checkbox"/> | <input type="checkbox"/> | <input type="checkbox"/> |

\*Items deleted after the psychometric analyses

## Part II

Considering everything, have the examinations resulted in any of the following:

Please choose only one alternative per question

1. After the examinations, my aspects of life have been:

|                           |                          |                           |                           |                          |
|---------------------------|--------------------------|---------------------------|---------------------------|--------------------------|
| <input type="checkbox"/>  | <input type="checkbox"/> | <input type="checkbox"/>  | <input type="checkbox"/>  | <input type="checkbox"/> |
| Much less<br>broad        | Less broad               | <b>The same as before</b> | More broad                | Much more<br>broad       |
| <b>Less broad aspects</b> |                          |                           | <b>More broad aspects</b> |                          |

2. After the examinations, my enjoyment of life:

|                          |                          |                           |                          |                          |
|--------------------------|--------------------------|---------------------------|--------------------------|--------------------------|
| <input type="checkbox"/> | <input type="checkbox"/> | <input type="checkbox"/>  | <input type="checkbox"/> | <input type="checkbox"/> |
| Much less                | Less                     | <b>The same as before</b> | More                     | Much more                |
| <b>Less enjoyment</b>    |                          |                           | <b>More enjoyment</b>    |                          |

3. After the examinations, I feel:

|                          |                          |                                 |                          |                          |
|--------------------------|--------------------------|---------------------------------|--------------------------|--------------------------|
| <input type="checkbox"/> | <input type="checkbox"/> | <input type="checkbox"/>        | <input type="checkbox"/> | <input type="checkbox"/> |
| Much less<br>relaxed     | Less relaxed             | <b>As relaxed as<br/>before</b> | More relaxed             | Much more<br>relaxed     |
| <b>Less relaxed</b>      |                          |                                 | <b>More relaxed</b>      |                          |

4. After the examinations, my abilities to listen to other people's problems:

|                          |                          |                           |                          |                          |
|--------------------------|--------------------------|---------------------------|--------------------------|--------------------------|
| <input type="checkbox"/> | <input type="checkbox"/> | <input type="checkbox"/>  | <input type="checkbox"/> | <input type="checkbox"/> |
| Much less                | Less                     | <b>The same as before</b> | More                     | Much more                |
| <b>Less listening</b>    |                          |                           | <b>More listening</b>    |                          |

5. After the examinations, my understanding for other people's problems:

|                           |                          |                           |                           |                          |
|---------------------------|--------------------------|---------------------------|---------------------------|--------------------------|
| <input type="checkbox"/>  | <input type="checkbox"/> | <input type="checkbox"/>  | <input type="checkbox"/>  | <input type="checkbox"/> |
| Much less                 | Less                     | <b>The same as before</b> | More                      | Much more                |
| <b>Less understanding</b> |                          |                           | <b>More understanding</b> |                          |

Considering everything, have the examinations resulted in any of the following:

Please choose only one alternative per question

6. After the examinations, my relation to my family is:

|                          |                          |                           |                          |                          |
|--------------------------|--------------------------|---------------------------|--------------------------|--------------------------|
| <input type="checkbox"/> | <input type="checkbox"/> | <input type="checkbox"/>  | <input type="checkbox"/> | <input type="checkbox"/> |
| Much less close          | Less close               | <b>The same as before</b> | More close               | Much more close          |
| <b>Less close</b>        |                          |                           | <b>More close</b>        |                          |

7. After the examinations, the relations to my friends are:

|                          |                          |                           |                          |                          |
|--------------------------|--------------------------|---------------------------|--------------------------|--------------------------|
| <input type="checkbox"/> | <input type="checkbox"/> | <input type="checkbox"/>  | <input type="checkbox"/> | <input type="checkbox"/> |
| Much less close          | Less close               | <b>The same as before</b> | More close               | Much more close          |
| <b>Mindre tæt</b>        |                          |                           | <b>Mere tæt</b>          |                          |

8. After the examinations, my relations to other people are:

|                          |                          |                           |                          |                          |
|--------------------------|--------------------------|---------------------------|--------------------------|--------------------------|
| <input type="checkbox"/> | <input type="checkbox"/> | <input type="checkbox"/>  | <input type="checkbox"/> | <input type="checkbox"/> |
| Much worse               | Worse                    | <b>The same as before</b> | Better                   | Much better              |
| <b>Worse</b>             |                          |                           | <b>Better</b>            |                          |

9. After the examinations, my feeling of inner calm is:

|                          |                          |                           |                          |                          |
|--------------------------|--------------------------|---------------------------|--------------------------|--------------------------|
| <input type="checkbox"/> | <input type="checkbox"/> | <input type="checkbox"/>  | <input type="checkbox"/> | <input type="checkbox"/> |
| Much less                | Less                     | <b>The same as before</b> | More                     | Much more                |
| <b>Less calm</b>         |                          |                           | <b>More calm</b>         |                          |

10. After the examinations, my thoughts about the future are:

|                           |                          |                           |                           |                          |
|---------------------------|--------------------------|---------------------------|---------------------------|--------------------------|
| <input type="checkbox"/>  | <input type="checkbox"/> | <input type="checkbox"/>  | <input type="checkbox"/>  | <input type="checkbox"/> |
| Much less bright          | Less bright              | <b>The same as before</b> | More bright               | Much more bright         |
| <b>Less bright future</b> |                          |                           | <b>More bright future</b> |                          |

11.\* After the examinations, my feeling of well-being is:

|                          |                          |                           |                          |                          |
|--------------------------|--------------------------|---------------------------|--------------------------|--------------------------|
| <input type="checkbox"/> | <input type="checkbox"/> | <input type="checkbox"/>  | <input type="checkbox"/> | <input type="checkbox"/> |
| Much less                | Less                     | <b>The same as before</b> | More                     | Much more                |
| <b>Less well-being</b>   |                          |                           | <b>More well-being</b>   |                          |



Considering everything, have the examinations resulted in any of the following:

**Please choose only one alternative per question**

12. After the examinations, my awareness of life is:

Much less

Less

**The same as before**

More

Much more

**Less awareness of life**

**More awareness of life**

13. After the examinations I value life:

Much less

Less

**The same as before**

More

Much more

**Value life less**

**Value life more**

14. After the examinations, I have:

Much less  
energy

Less energy

**The same as before**

More energy

Much more  
Energy

**Less energy**

**More energy**

15. After the examinations, my feeling of responsibility for my family is:

Much less

Less

**The same as before**

More

Much more

**Less responsibility**

**More responsibility**

16. After the examinations, I have lived life to the full:

Much less

Less

**The same as before**

More

Much more

**Live life less**

**Live life more**

Considering everything, have the examinations resulted in any of the following:

**Please choose only one alternative per question**

17. After the examinations, I feel:

|                          |                          |                           |                          |                          |
|--------------------------|--------------------------|---------------------------|--------------------------|--------------------------|
| <input type="checkbox"/> | <input type="checkbox"/> | <input type="checkbox"/>  | <input type="checkbox"/> | <input type="checkbox"/> |
| Much less relieved       | Less relieved            | <b>The same as before</b> | More relieved            | Much more relieved       |
| <b>Less relieved</b>     |                          |                           | <b>More relieved</b>     |                          |

18. After the examinations, I am:

|                          |                          |                           |                          |                          |
|--------------------------|--------------------------|---------------------------|--------------------------|--------------------------|
| <input type="checkbox"/> | <input type="checkbox"/> | <input type="checkbox"/>  | <input type="checkbox"/> | <input type="checkbox"/> |
| Much less impulsive      | Less impulsive           | <b>The same as before</b> | More impulsive           | Much more impulsive      |
| <b>Less impulsive</b>    |                          |                           | <b>More impulsive</b>    |                          |

19. After the examinations, my desire to venture into something new is:

|                          |                          |                           |                          |                          |
|--------------------------|--------------------------|---------------------------|--------------------------|--------------------------|
| <input type="checkbox"/> | <input type="checkbox"/> | <input type="checkbox"/>  | <input type="checkbox"/> | <input type="checkbox"/> |
| Much weaker              | Weaker                   | <b>The same as before</b> | Stronger                 | Much stronger            |
| <b>Weak desire</b>       |                          |                           | <b>Stronger desire</b>   |                          |

20. After the examinations, my courage to venture into something risky is:

|                          |                          |                           |                          |                          |
|--------------------------|--------------------------|---------------------------|--------------------------|--------------------------|
| <input type="checkbox"/> | <input type="checkbox"/> | <input type="checkbox"/>  | <input type="checkbox"/> | <input type="checkbox"/> |
| Much weaker              | Weaker                   | <b>The same as before</b> | Stronger                 | Much stronger            |
| <b>Less courage</b>      |                          |                           | <b>Mere modig</b>        |                          |

21. After the examinations, I have done things that overstepped my bounds:

|                          |                          |                           |                          |                          |
|--------------------------|--------------------------|---------------------------|--------------------------|--------------------------|
| <input type="checkbox"/> | <input type="checkbox"/> | <input type="checkbox"/>  | <input type="checkbox"/> | <input type="checkbox"/> |
| Much less                | Less                     | <b>The same as before</b> | More                     | Much more                |
| <b>Less</b>              |                          |                           | <b>More</b>              |                          |

\*Deleted after psychometric analyses
